# Supplementary material
Source: publisher figshare collection journal article supplement (https://sage.figshare.com/ndownloader/files/15034796)
Supplement: Supplementary file 1 [file 15034796]

TABLE A1

**Cochran-Mantel-Haenszel Estimates for Postoperative Cuff Integrity between the Delaminated and Non-delaminated Groups after Propensity Score Matching, according to Whether the single- or double-row repair**

|                  | Delaminated |           | Non-delaminated |          | OR<br>(95%<br>CI)         | <i>P</i><br>Value | <i>P</i><br>Heterogeneity <sup>a</sup> |
|------------------|-------------|-----------|-----------------|----------|---------------------------|-------------------|----------------------------------------|
|                  | SR          | DR        | SR              | DR       |                           |                   |                                        |
| Retear,<br>n (%) | 3 (33.3%)   | 5 (21.7%) | 1 (7.1%)        | 1 (5.6%) | 5.4<br>(1.011-<br>28.683) | .035              | .850                                   |

<sup>a</sup>*P* value for heterogeneity between the group of single- and double-row repair was evaluated using the Breslow-Day test.

CI, confidence interval; DR, double-row repair; OR, odds ratios; SR, single-row repair.

**TABLE A2**

**Cochran-Mantel-Haenszel Estimates for Postoperative Cuff Integrity between the Delaminated and Non-delaminated Groups after Propensity Score Matching, according to whether the infraspinatus tear was involved or not.**

|         | Delaminated |            | Non-delaminated |            | OR      | <i>P</i> | <i>P</i>                   |
|---------|-------------|------------|-----------------|------------|---------|----------|----------------------------|
|         | Isolated    | Cuff tears | Isolated        | Cuff tears | (95%    | Value    | Heterogeneity <sup>a</sup> |
|         | SS tears    | including  | SS tears        | including  | CI)     |          |                            |
|         |             | IS         |                 | IS         |         |          |                            |
| Retear, | 6 (26.1%)   | 2 (22.2%)  | 2 (7.1%)        | 0 (0%)     | 5.5     | .038     | .617                       |
| n (%)   |             |            |                 |            | (1.013– |          |                            |
|         |             |            |                 |            | 29.976) |          |                            |

<sup>a</sup>*P* value for heterogeneity between the group of isolated SS tear and the group of cuff tears

including IS was evaluated using the Breslow-Day test.

CI, confidence interval; IS, infraspinatus; OR, odds ratios; SS, supraspinatus.
